# Supplementary material for: Severe Malaria in Angola: Clinical Profile and Disease Outcome among Adults from a Low-Endemic Area
Source: Preprints.org preprint supplement (doi:10.20944/preprints202403.0541.v1), 2024-03-08
Supplement: Supplementary file 1 [file supplementary]

**Supplementary Table S1 – Severe malaria profile of patients (regarding severe malaria manifestations) admitted to HCL during 2021 and 2022.** The first line displays the number of patients for each department and year. If data was missing for some patients, the percentage of patients meeting the specific severe malaria criteria was calculated based on the available patient count mentioned in the corresponding table cell.

|  | | **2021** | | | **2022** | | |  |
| --- | --- | --- | --- | --- | --- | --- | --- | --- |
| **Severe malaria criteria** | | **ICU** | **MED** | **INF** | **ICU** | **MED** | **INF** | **Total (n=640)** |
| **Impaired consciousness** | | 16/26 | 8/124 | 0/17 | 30/55 | 10/334 | 4/84 | 68/640  10.6% |
| **Multiple convulsions** | | 6/26 | 5/124 | 0/17 | 6/55 | 13/334 | 2/84 | 32/640  5.0% |
| **Metabolic Acidosis** | | 9/10 | 2/7 | 0/17 | 27/54 | 0/334 | 0/84 | 38/506  7.5% |
| **Hypoglycaemia** | | 2/22 | 1/79 | 0/9 | 3/50 | 5/262 | 0/49 | 11/471  2.3% |
| **Anaemia** | Haemoglobin  (≤ 7 g/dL) | 4/26 | 13/124 | 1/17 | 9/55 | 34/334 | 13/83 | 74/639  11.6% |
| Haematocrit  (≤ 20%) | 5/26 | 15/123 | 1/17 | 9/55 | 35/334 | 13/83 | 78/638  12.2% |
| Overall | 5/26 | 15/124 | 1/17 | 11/55 | 38/334 | 14/84 | 84/640  13.1% |
| **Renal impairment** | Creatinine  (> 3 mg/dL) | 8/24 | 4/98 | 0/11 | 18/49 | 43/292 | 11/73 | 84/547  15.4% |
| Blood Urea  (>20 mmol/L) | 14/25 | 19/98 | 4/11 | 43/55 | 99/295 | 26/75 | 205/559  36.7% |
| Overall | 14/25 | 20/98 | 4/11 | 43/55 | 101/295 | 27/75 | 209/559  37.4% |
| **Jaundice** | | 11/23 | 20/95 | 3/10 | 28/51 | 74/293 | 21/72 | 157/544  28.9% |
| **Hyperparasitaemia** | | 2/24 | 7/104 | 3/16 | 3/51 | 23/303 | 2/73 | 40/571  7.0% |
| **Shock** | | 3/26 | 6/123 | 0/16 | 3/55 | 38/333 | 12/84 | 62/637  9.7% |
| **Bleeding** | | 2/26 | 5/124 | 0/17 | 5/55 | 8/334 | 2/84 | 22/640  3.4% |
